# Supplementary material for: Structural characterization and solvent vapor sorption of two solvent-dependent Zn(ii) supramolecular architectures based on a flexible tripodal thioether-based pyridyl ligand and a dicarboxylate-based ligand
Source: Royal Society of Chemistry journal article supplement (doi:10.1039/d2ce01440h), 2022-11-22
Supplement: d2ce01440h1.pdf [file d2ce01440h1.pdf]

# Structural Characterization and Solvent Vapor Sorption of Two Solvent-Dependent Zn(II) Supramolecular Architectures Based on a Flexible Tripodal Thioether-based Pyridyl Ligand and a Dicarboxylate-based Ligand

Chih-Chieh Wang,<sup>\*a</sup> Yu-Chen Chung,<sup>a</sup> Chuan-Yien Liu,<sup>a</sup> Gene-Hsiang Lee,<sup>b</sup> Su-Ying Chien,<sup>b</sup> Bo-Hao Chen<sup>c</sup> and Yu-Chun Chuang<sup>c</sup>

<sup>a</sup>Department of Chemistry, Soochow University, Taipei 11102, Taiwan. Fax: 886-2-28811053, Email: ccwang@scu.edu.tw.

<sup>b</sup>Instrumentation Center, National Taiwan University, Taipei 10617, Taiwan.

<sup>c</sup>National Synchrotron Radiation Research Center, Hsinchu 30076, Taiwan. Email: [chuang.yc@nsrrc.org.tw](mailto:chuang.yc@nsrrc.org.tw).

Table S1 Selected bond lengths (Å) and angle (°) around Zn(II) ion for **1**

Table S2 The parameters of O–H...O and O–H...Cl hydrogen bonds for **1**

Table S3 Selected bond lengths (Å) and angle (°) around Zn(II) ion for **2**

Table S4 The parameters of O–H...O hydrogen bonds for **2**

Figure S1 (a) Coordination environments about Zn(II) ion in  $[\text{Zn}_3(\text{L}^1)_2(\text{L}^2)(\text{Cl})_4(\text{CH}_3\text{OH})_2] \cdot 6\text{CH}_3\text{OH}$  (**1**) with atom labelling scheme (ORTEP drawing, 50 % thermal ellipsoids). Hydrogen atoms and guest  $\text{CH}_3\text{OH}$  molecules are omitted for clarity. (b) The 2D doubly-interpenetrating network with space-filling mode; (c) The 2D doubly-interpenetrating network with space-filling mode viewing along the *b* axis.

Figure S2 (a) Coordination environments about Zn(II) ion in  $[\text{Zn}(\text{L}^1)(\text{L}^2)(\text{H}_2\text{O})] \cdot 2\text{C}_2\text{H}_5\text{OH}$  (**2**) with atom labelling scheme (ORTEP drawing, 30 % thermal ellipsoids). Hydrogen atoms and guest  $\text{C}_2\text{H}_5\text{OH}$  molecules are omitted for clarity. (b) The triply-interpenetrating 3D supramolecular architecture with space-filling mode.

Figure S3 Thermogravimetric (TG) measurement of (a) **1** and (b) **2**.

Figure S4 (a) Enlarge in-situ XRD powder diffraction patterns of **1**, (b) The Le Bail refinement of 130 °C de-hydrated form of sample **2** and agreement factor  $R_{\text{wp}}$  is

5.516%.

Figure S5 (a) N<sub>2</sub> ad-/desorption isotherms of dehydrated species **1** at 77 K. (b) N<sub>2</sub> ad-/desorption isotherms of dehydrated species **2** at 77 K.

**Table S1.** Selected bond lengths (Å) and angle (°) around Zn(II) ion for **1<sup>a</sup>**

|                     |           |                     |            |
|---------------------|-----------|---------------------|------------|
| Zn(1)–O(1)          | 2.082(3)  | Zn(2)–N(3)          | 2.038(4)   |
| Zn(1)–O(1)#1        | 2.082(3)  | Zn(2)–N(2)#2        | 2.048(4)   |
| Zn(1)–N(1)          | 2.142(3)  | Zn(2)–Cl(2)         | 2.2149(14) |
| Zn(1)–N(1) #1       | 2.142(3)  | Zn(2)–Cl(1)         | 2.2211(14) |
| Zn(1)–O(4)          | 2.159(3)  |                     |            |
| Zn(1)–O(4)#1        | 2.159(3)  |                     |            |
| O(1)-Zn(1)-O(1)#1   | 180.0     | O(1)#1-Zn(1)-O(4)#1 | 87.87(12)  |
| O(1)-Zn(1)-N(1)#1   | 89.22(13) | N(1)#1-Zn(1)-O(4)#1 | 87.39(13)  |
| O(1)#1-Zn(1)-N(1)#1 | 90.78(13) | N(1)-Zn(1)-O(4)#1   | 92.61(13)  |
| O(1)-Zn(1)-N(1)     | 90.78(13) | O(4)-Zn(1)-O(4)#1   | 180.0      |
| O(1)#1-Zn(1)-N(1)   | 89.22(13) | N(3)-Zn(2)-N(2)#2   | 100.00(18) |
| N(1)#1-Zn(1)-N(1)   | 180.0     | N(3)-Zn(2)-Cl(2)    | 107.13(13) |
| O(1)-Zn(1)-O(4)     | 87.87(12) | N(2)#2-Zn(2)-Cl(2)  | 109.32(14) |
| O(1)#1-Zn(1)-O(4)   | 92.13(12) | N(3)-Zn(2)-Cl(1)    | 108.37(13) |
| N(1)#1-Zn(1)-O(4)   | 92.61(13) | N(2)#2-Zn(2)-Cl(1)  | 104.10(14) |
| N(1)-Zn(1)-O(4)     | 87.39(13) | Cl(2)-Zn(2)-Cl(1)   | 125.11(6)  |
| O(1)-Zn(1)-O(4)#1   | 92.13(12) |                     |            |

Symmetry transformations used to generate equivalent atoms:

#1 -x+2, -y, -z #2 -x-1, -y, -z+1 #3 -x+2, -y-1, -z

**Table S2.** The parameters of O–H...O and O–H...Cl hydrogen bonds for **1<sup>a</sup>**

| D–H (Å)   | D...A(Å)                 | H...A(Å)                 | ∠ D–H...Acceptor(°)             |
|-----------|--------------------------|--------------------------|---------------------------------|
| O(3)–H(3) | O(3)...O(2)              | H(3)...O(2)              | ∠ O(3)–H(3)...O(2)              |
| 0.840     | 2.543                    | 1.811                    | 144.6                           |
| O(4)–H(4) | O(4)...O(2) <sub>i</sub> | H(4)...O(2) <sub>i</sub> | ∠ O(4)–H(4)...O(2) <sub>i</sub> |
| 0.883     | 2.633                    | 1.800                    | 144.6                           |
| O(5)–H(5) | O(5)...O(6)              | H(5)...O(6)              | ∠ O(5)–H(5)...O(6)              |
| 0.840     | 2.792                    | 2.181                    | 129.6                           |
| O(7)–H(7) | O(7)...O(5)              | H(7)...O(5)              | ∠ O(7)–H(7)...O(5)              |
| 0.840     | 2.677                    | 2.204                    | 115.6                           |
| O(6)–H(6) | O(6)...Cl(2)             | H(6)...Cl(2)             | ∠ O(6)–H(6)...Cl(2)             |
| 0.840     | 3.207                    | 2.417                    | 157.0                           |

<sup>a</sup>Symmetry operations used to generate equivalent atoms: (i) -x+5/2, y+1/2, -z+1/2;

**Table S3.** Selected bond lengths (Å) and angle (°) around Zn(II) ion for **2<sup>a</sup>**

|                   |            |                     |            |
|-------------------|------------|---------------------|------------|
| Zn(1)-O(4)        | 2.104(4)   | Zn(1)-N(3)#1        | 2.155(12)  |
| Zn(1)-O(1)        | 2.116(3)   | Zn(1)-N(2)#2        | 2.179(5)   |
| Zn(1)-O(7)        | 2.131(4)   | Zn(1)-N(1)          | 2.151(5)   |
| O(4)-Zn(1)-O(1)   | 87.07(15)  | O(7)-Zn(1)-N(3)#1   | 82.80(3)   |
| O(4)-Zn(1)-O(7)   | 91.94(15)  | N(1)-Zn(1)-N(3)#1   | 98.20(3)   |
| O(1)-Zn(1)-O(7)   | 91.61(15)  | O(4)-Zn(1)-N(2)#2   | 172.38(17) |
| O(4)-Zn(1)-N(1)   | 85.86(16)  | O(1)-Zn(1)-N(2)#2   | 87.42(16)  |
| O(1)-Zn(1)-N(1)   | 87.26(16)  | O(7)-Zn(1)-N(2)#2   | 93.46(18)  |
| O(7)-Zn(1)-N(1)   | 177.57(16) | N(1)-Zn(1)-N(2)#2   | 88.64(19)  |
| O(4)-Zn(1)-N(3)#1 | 90.60(3)   | N(3)#1-Zn(1)-N(2)#2 | 95.40(3)   |
| O(1)-Zn(1)-N(3)#1 | 173.90(3)  |                     |            |

Symmetry transformations used to generate equivalent atoms: #1 -x+1, y+1/2, -z+1/2; #2 -x+2, y+1/2, -z+1/2

**Table S4.** The parameters of O–H...O hydrogen bonds for **2<sup>a</sup>**

| D–H (Å)              | D...A(Å)                             | H...A(Å)                             | ∠ D–H...Acceptor(°)                          |
|----------------------|--------------------------------------|--------------------------------------|----------------------------------------------|
| O(1S)–H(1S)<br>0.840 | O(1S)...O(3S) <sub>i</sub><br>2.879  | H(1S)...O(3S) <sub>i</sub><br>2.243  | ∠ O(1S)–H(1S)...O(3S) <sub>i</sub><br>132.5  |
| O(2S)–H(2S)<br>0.840 | O(2S)...O(6) <sub>ii</sub><br>2.680  | H(2S)...O(6) <sub>ii</sub><br>1.840  | ∠ O(2S)–H(2S)...O(6) <sub>ii</sub><br>163.0  |
| O(3)–H(3)<br>0.839   | O(3)...O(2)<br>2.541                 | H(3)...O(2)<br>1.791                 | ∠ O(3)–H(3)...O(2)<br>148.0                  |
| O(3S)–H(3S)<br>0.840 | O(3S)...O(3) <sub>iii</sub><br>2.789 | H(3S)...O(3) <sub>iii</sub><br>2.056 | ∠ O(3S)–H(3S)...O(3) <sub>iii</sub><br>145.5 |
| O(6)–H(6)<br>0.839   | O(6)...O(2S) <sub>iv</sub><br>2.655  | H(6)...O(2S) <sub>iv</sub><br>1.921  | ∠ O(6)–H(6)...O(2S) <sub>iv</sub><br>145.4   |
| O(7)–H(7A)<br>0.815  | O(7)...O(2)<br>2.709                 | H(7A)...O(2)<br>1.899                | ∠ O(7)–H(7A)...O(2)<br>172.5                 |
| O(7)–H(7B)<br>0.824  | O(7)...O(5)<br>2.702                 | H(7B)...O(5)<br>2.010                | ∠ O(7)–H(7B)...O(2)<br>141.3                 |

<sup>a</sup>Symmetry operations used to generate equivalent atoms:

(i) -x+1, y+3/2, -z+3/2; (ii) x, y, z-1; (iii) -x+2, y+3/2, -z+5/2; (iv) x, y, z+1.

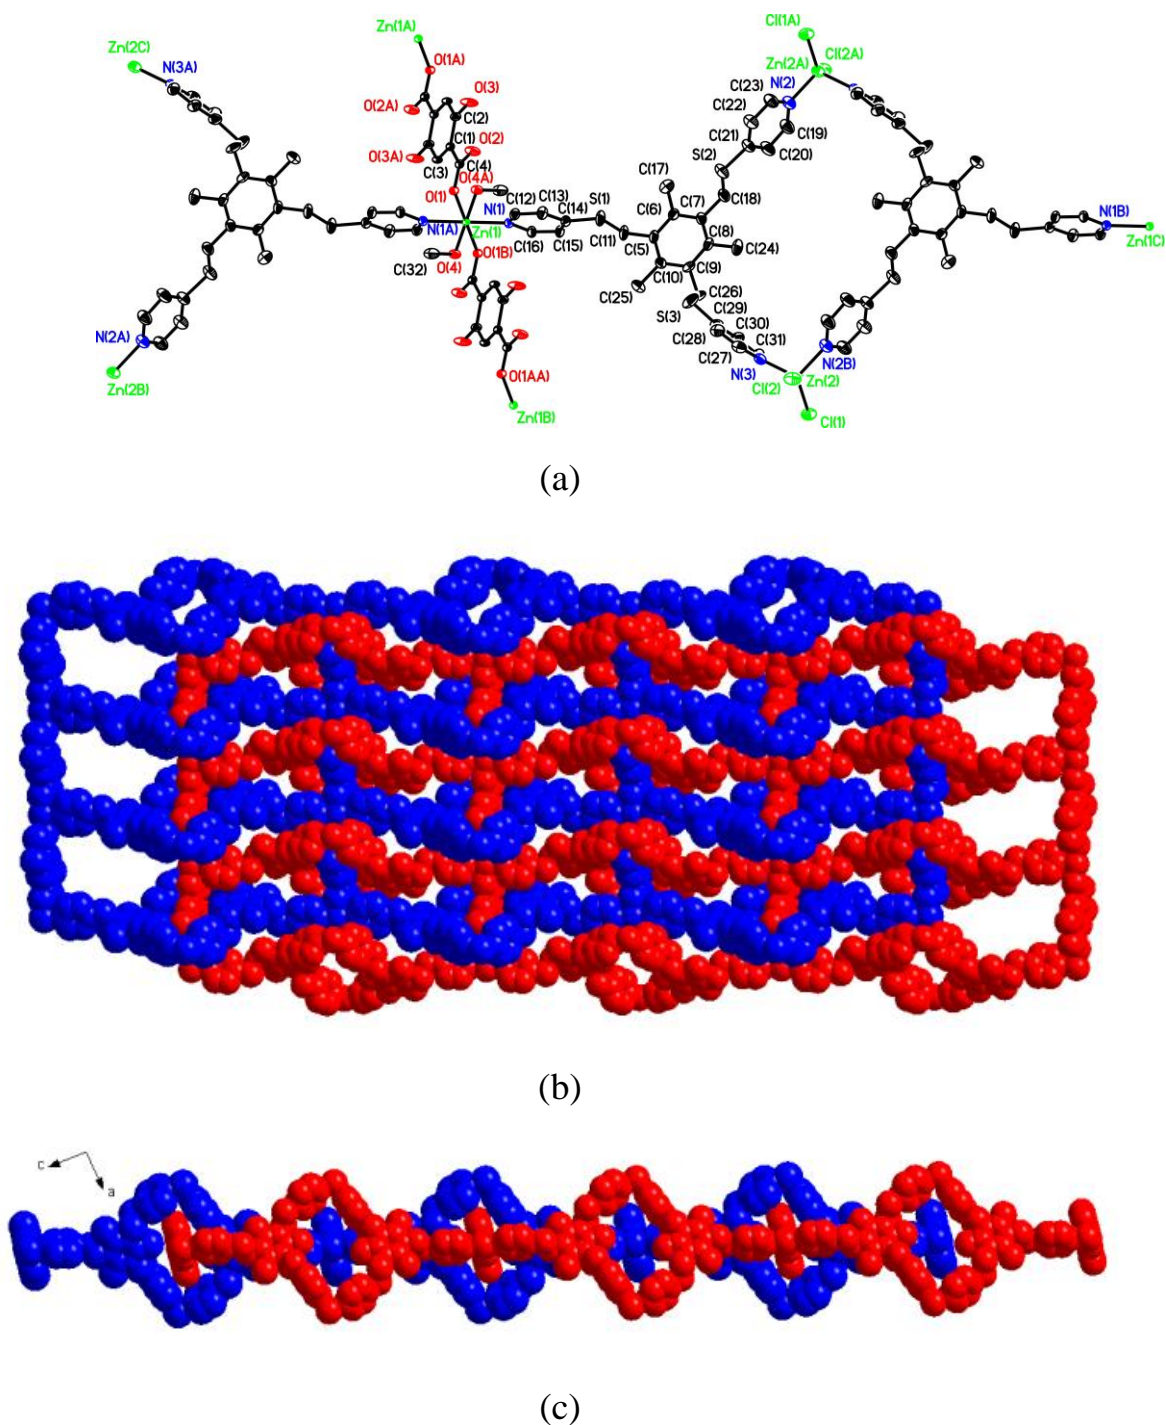

Figure S1. (a) Coordination environments about Zn(II) ion in  $[\text{Zn}_3(\text{L}^1)_2(\text{L}^2)(\text{Cl})_4(\text{CH}_3\text{OH})_2] \cdot 6\text{CH}_3\text{OH}$  (**1**) with atom labelling scheme (ORTEP drawing, 50 % thermal ellipsoids). Hydrogen atoms and guest  $\text{CH}_3\text{OH}$  molecules are omitted for clarity. (b) The 2D doubly-interpenetrating network with space-filling mode; (c) The 2D doubly-interpenetrating network with space-filling mode viewing along the  $b$  axis.

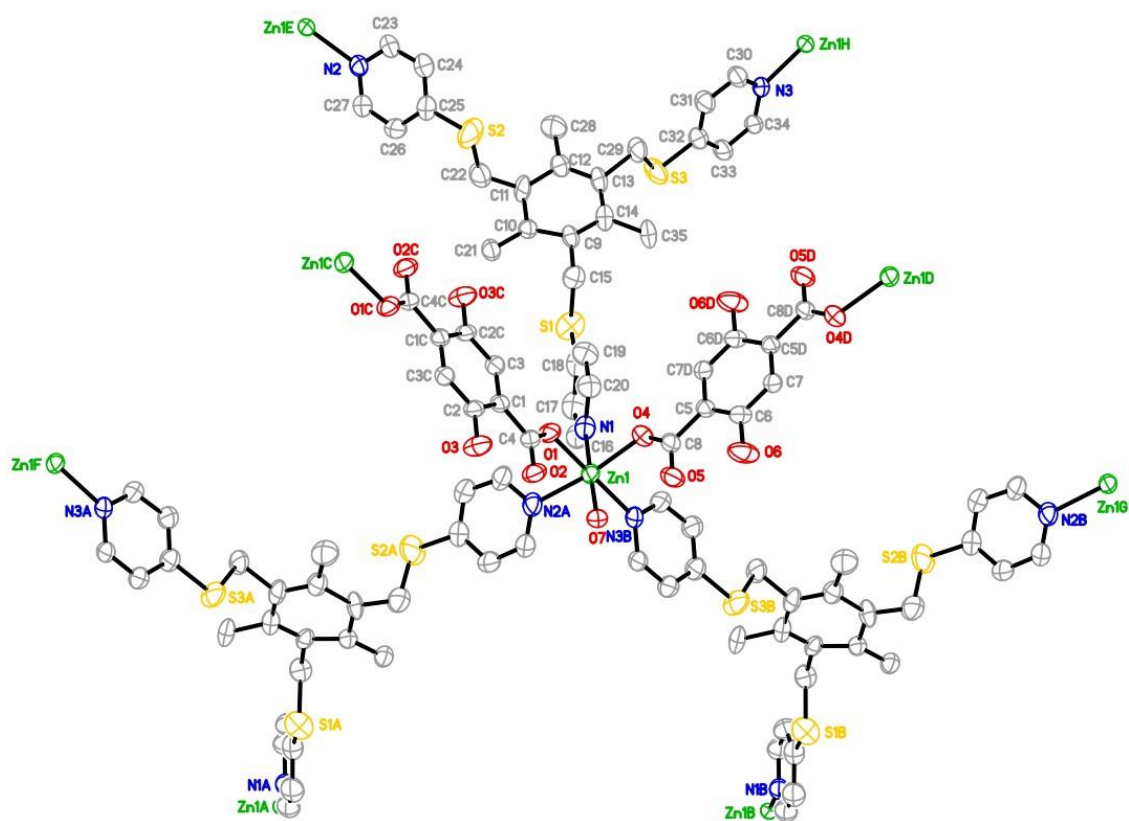

(a)

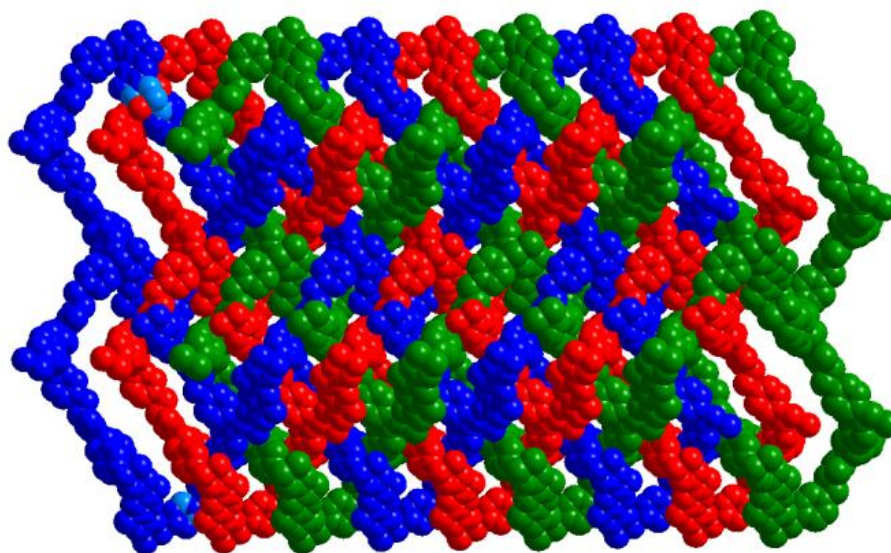

(b)

Figure S2. (a) Coordination environments about Zn(II) ion in  $[\text{Zn}(\text{L}^1)(\text{L}^2)(\text{H}_2\text{O})] \cdot 2\text{C}_2\text{H}_5\text{OH}$  (**2**) with atom labelling scheme (ORTEP drawing, 30 % thermal ellipsoids). Hydrogen atoms and guest  $\text{C}_2\text{H}_5\text{OH}$  molecules are omitted for clarity. (b) The triply-interpenetrating 3D supramolecular architecture with space-filling mode.

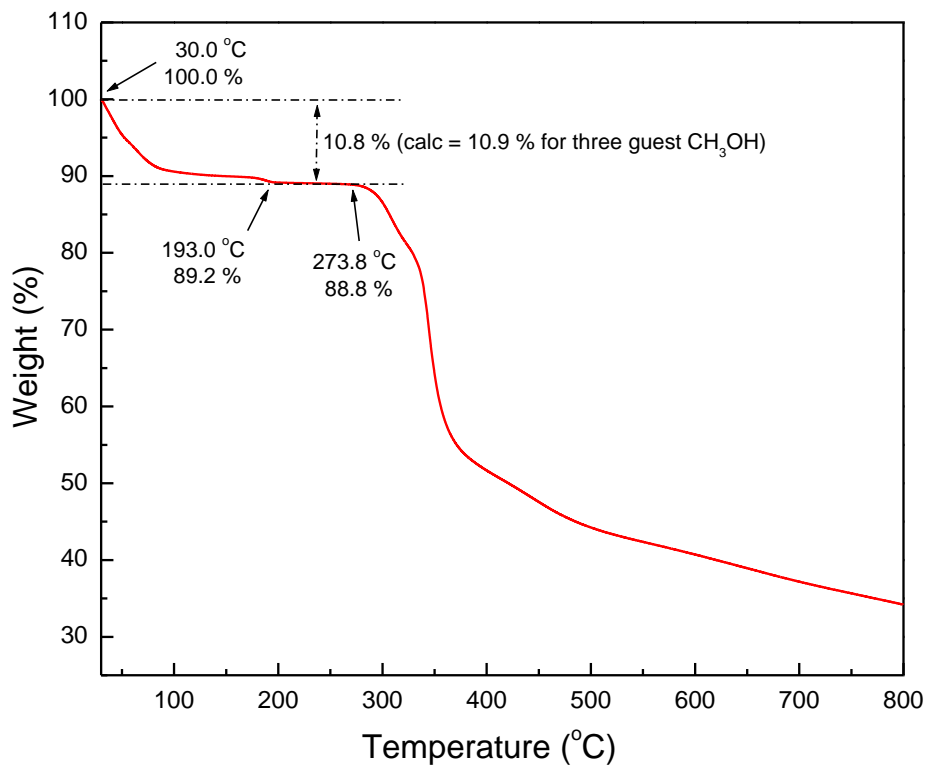

(a)

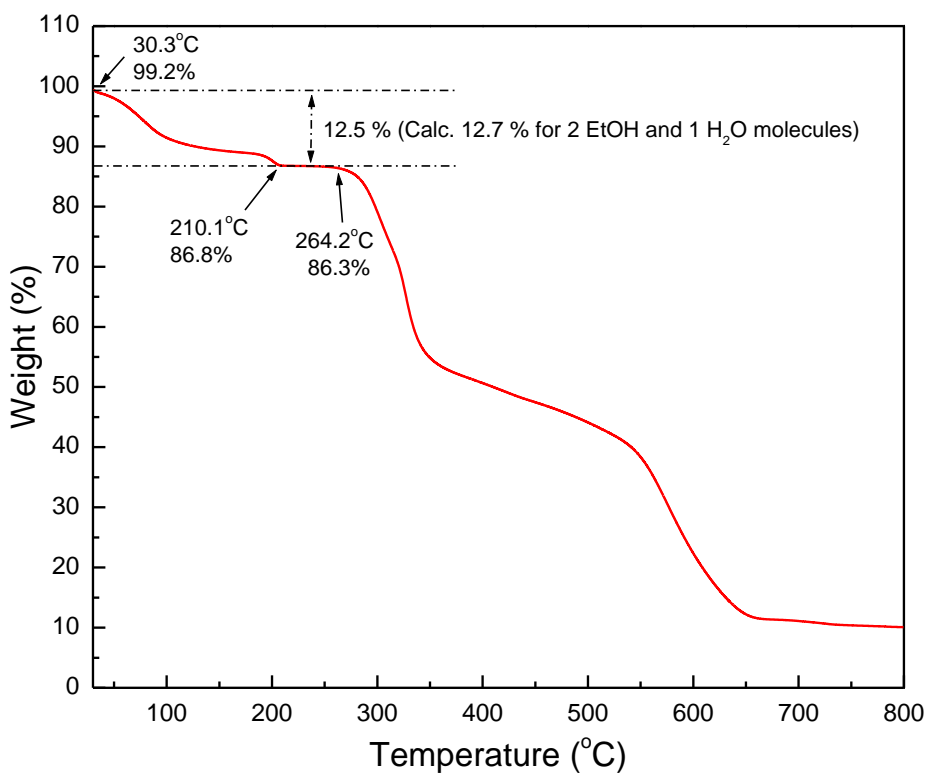

(b)

Figure S3. Thermogravimetric (TG) measurement of (a) **1** and (b) **2**.

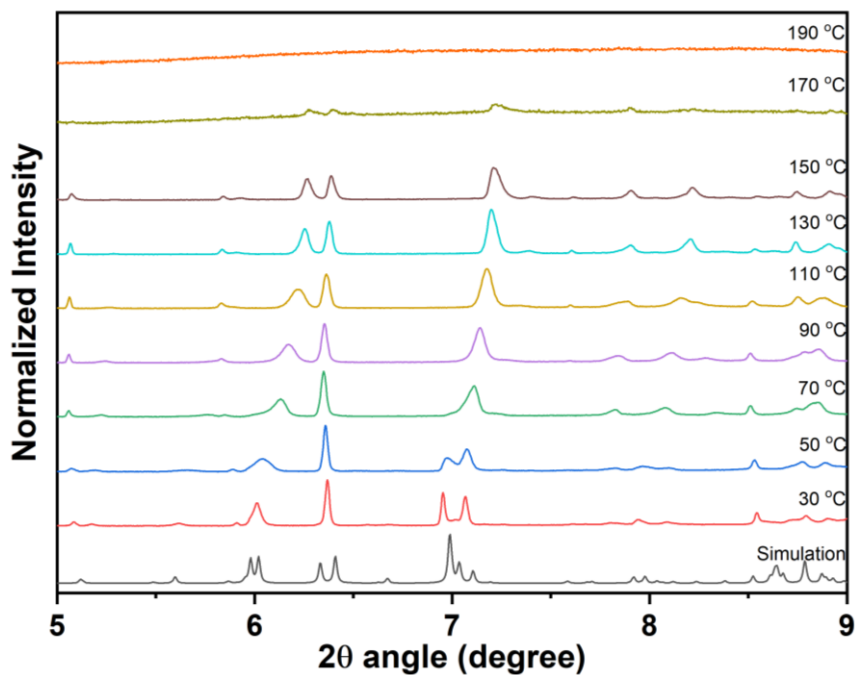

(a)

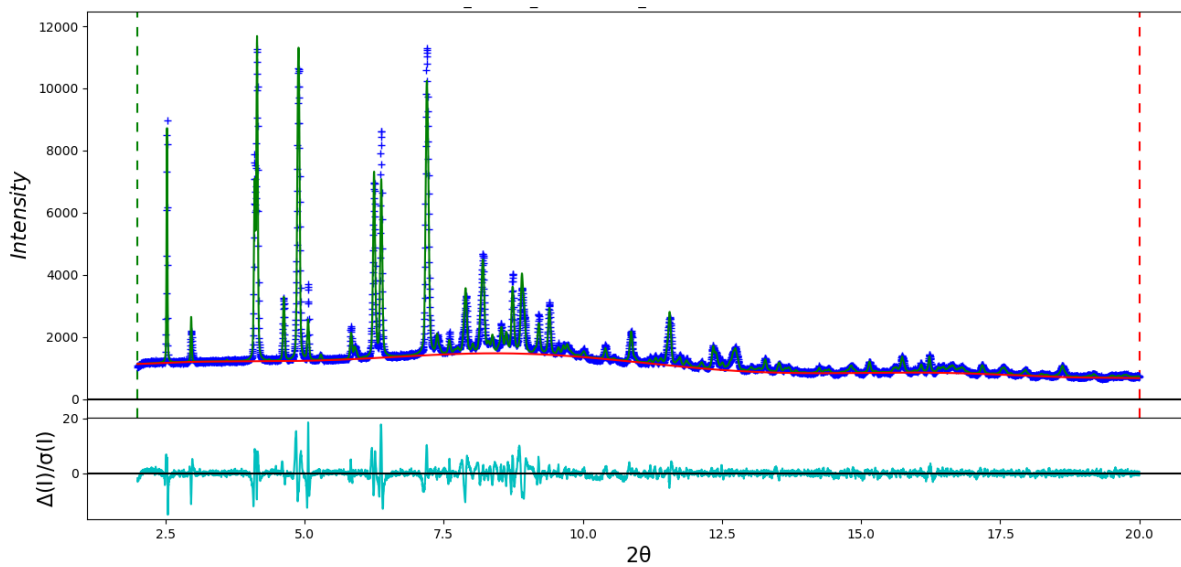

(b)

Figure S4. (a) Enlarge in-situ XRD powder diffraction patterns of **1**, (b) The Le Bail refinement of 130 °C de-hydrated form of sample **2** and agreement factor  $R_{wp}$  is 5.516%.



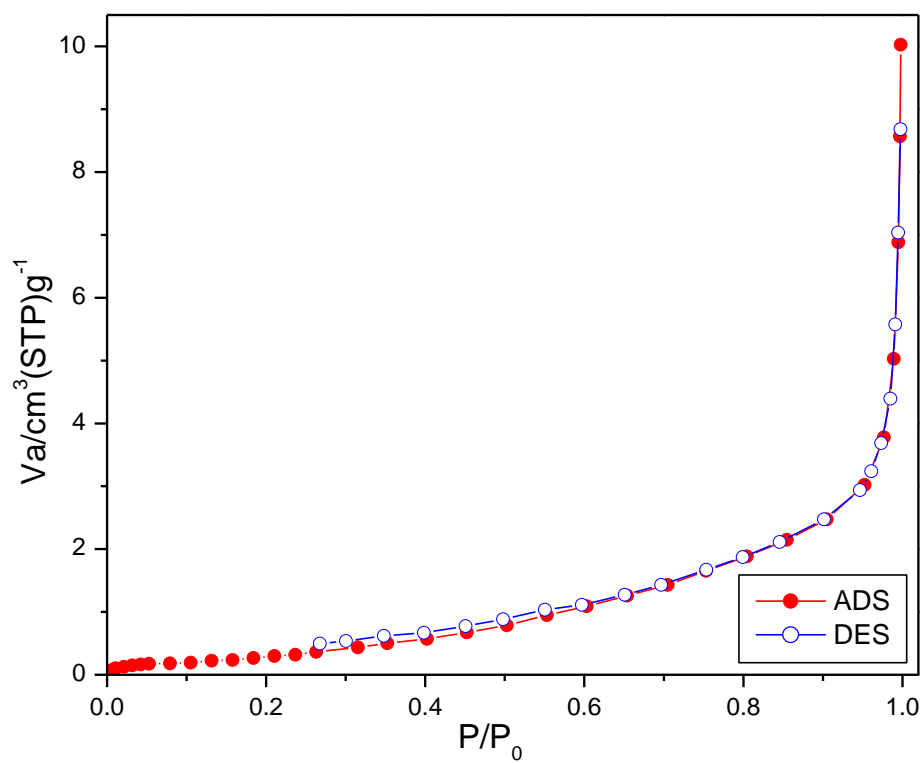

(a)

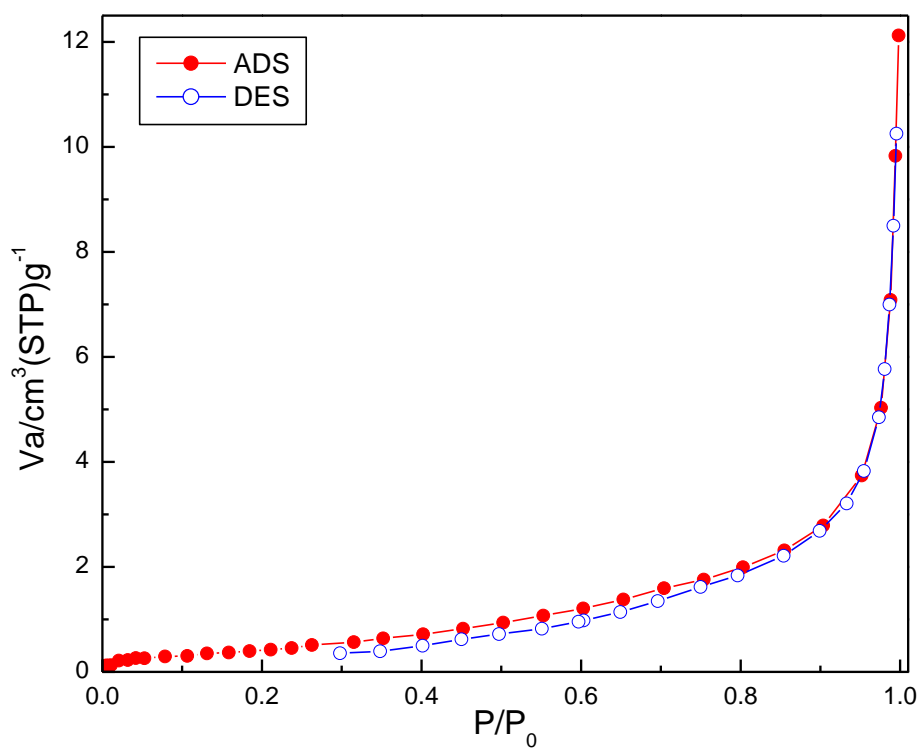

(b)

Figure S5.  $N_2$  ad-/desorption isotherms of (a) dehydrated species **1** and (b) dehydrated species **2** at 77 K.
